# Supplementary material for: Distinct effects of phyllosphere and rhizosphere microbes on invader Ageratina adenophora during its early life stages
Source: eLife. 2024 Jun 19;13:RP95502. doi: 10.7554/eLife.95502 (PMC11186635; doi:10.7554/eLife.95502)
Supplement: Figure 3—source data 1. [file elife-95502-fig3-data1.xlsx]

## Sheet: Sheet1
Figure 3 source date 1: Potential functions of the core bacteria in A. adenophora rhizosphere soils. The bold text shows the N circle-related functional groups.
Function group	Relative abundance
nitrate reduction	0.0601
nitrate respiration	0.0594
nitrogen respiration	0.0594
nitrate denitrification	0.059
nitrite denitrification	0.059
nitrous oxide denitrification	0.059
denitrification	0.059
nitrite respiration	0.059
nitrogen fixation	0.0326
ureolysis	0.0036
chemoheterotrophy	0.1432
aerobic chemoheterotrophy	0.141
photoheterotrophy	0.0387
phototrophy	0.0387
anoxygenic photoautotrophy S oxidizing	0.0384
anoxygenic photoautotrophy	0.0384
photoautotrophy	0.0384
predatory or exoparasitic	0.0031
aromatic compound degradation	0.0027
chitinolysis	0.0021
arsenate detoxification	0.0008
dissimilatory arsenate reduction	0.0008
plastic degradation	0.0008
fermentation	0.0005
dark oxidation of sulfur compounds	0.0005
invertebrate parasites	0.0004
human pathogens pneumonia	0.0004
human pathogens all	0.0004
human associated	0.0004
animal parasites or symbionts	0.0004
