# Supplementary material for: Distinct effects of phyllosphere and rhizosphere microbes on invader Ageratina adenophora during its early life stages
Source: eLife. 2024 Jun 19;13:RP95502. doi: 10.7554/eLife.95502 (PMC11186635; doi:10.7554/eLife.95502)
Supplement: Figure 3—source data 2. [file elife-95502-fig3-data2.xlsx]

## Sheet: Sheet1
Figure 3 source date 2: Potential functions of the core bacteria in A. adenophora leaf litter. The bold text shows the N circle-related functional groups.
Function group	Relative abundance
ureolysis	0.1568
nitrate respiration	0.0003
nitrate reduction	0.0003
nitrogen respiration	0.0003
aerobic chemoheterotrophy	0.393
chemoheterotrophy	0.393
plant pathogen	0.0229
human pathogens all	0.0108
human associated	0.0108
animal parasites or symbionts	0.0108
chitinolysis	0.0003
aromatic compound degradation	0.0003
photoheterotrophy	0.0002
phototrophy	0.0002
