# Supplementary material for: Distinct effects of phyllosphere and rhizosphere microbes on invader Ageratina adenophora during its early life stages
Source: eLife. 2024 Jun 19;13:RP95502. doi: 10.7554/eLife.95502 (PMC11186635; doi:10.7554/eLife.95502)
Supplement: Figure 3—source data 3. [file elife-95502-fig3-data3.xlsx]

## Sheet: Sheet1
Figure 3 source date 3: Potential functional guilds of core fungi in A. adenophora rhizosphere soils. The bold text shows plant pathogen-related guilds.
Guild	Relative abundance
Plant Pathogen	0.1909
Endophyte‒Plant Pathogen	0.0385
Animal Pathogen-Endophyte-Fungal Parasite-Lichen Parasite-Plant Pathogen-Wood Saprotroph	0.0373
Animal Pathogen-Endophyte-Lichen Parasite-Plant Pathogen-Soil Saprotroph-Wood Saprotroph	0.0216
Animal Pathogen-Endophyte‒Plant Pathogen-Undefined Saprotroph	0.0195
Endophyte‒Plant Pathogen-Wood Saprotroph	0.0124
Animal Pathogen-Plant Pathogen-Undefined Saprotroph	0.0106
Endophyte-Lichen Parasite-Plant Pathogen-Undefined Saprotroph	0.0044
Plant Pathogen-Wood Saprotroph	0.0029
Animal Endosymbiont-Animal Pathogen-Endophyte‒Plant Pathogen-Undefined Saprotroph	0.0011
Algal Parasite-Bryophyte Parasite-Fungal Parasite-Undefined Saprotroph	0.0069
Animal Pathogen	0.0508
Animal Pathogen-Endophyte-Epiphyte-Undefined Saprotroph	0.0159
Animal Pathogen-Fungal Parasite-Undefined Saprotroph	0.0712
Bryophyte Parasite-Dung Saprotroph-Ectomycorrhizal-Fungal Parasite-Leaf Saprotroph-Plant Parasite-Undefined Saprotroph-Wood Saprotroph	0.0076
Dung Saprotroph-Undefined Saprotroph-Wood Saprotroph	0.0034
Ectomycorrhizal	0.1633
Endophyte-Insect Pathogen	0.0121
Endophyte-Litter Saprotroph-Soil Saprotroph-Undefined Saprotroph	0.173
Fungal Parasite	0.0009
Insect Pathogen	0.0066
Leaf Saprotroph	0.0016
Undefined Saprotroph	0.0108
unassigned	0.1366
