# Supplementary material for: Distinct effects of phyllosphere and rhizosphere microbes on invader Ageratina adenophora during its early life stages
Source: eLife. 2024 Jun 19;13:RP95502. doi: 10.7554/eLife.95502 (PMC11186635; doi:10.7554/eLife.95502)
Supplement: Figure 3—source data 4. [file elife-95502-fig3-data4.xlsx]

## Sheet: Sheet1
Figure 3 source date 4: Potential functional guilds of the core fungi in A. adenophora leaf litter. The bold text shows plant pathogen-related guilds.
Guild	Relative abundance
Animal Pathogen-Plant Pathogen-Undefined Saprotroph	0.4682
Animal Pathogen-Endophyte‒Plant Pathogen-Wood Saprotroph	0.1971
Fungal Parasite-Plant Pathogen-Plant Saprotroph	0.0056
Endophyte‒Plant Pathogen-Undefined Saprotroph	0.0045
Animal Pathogen-Endophyte-Ericoid Mycorrhizal-Plant Pathogen-Wood Saprotroph	0.0024
Plant Pathogen-Wood Saprotroph	0.0021
Plant Pathogen	0.0013
Animal Endosymbiont-Animal Pathogen-Endophyte‒Plant Pathogen-Undefined Saprotroph	0.0008
Animal Pathogen	0.0109
Animal Pathogen-Endophyte-Endosymbiont-Epiphyte-Soil Saprotroph-Undefined Saprotroph	0.0113
Animal Pathogen-Endophyte-Epiphyte-Undefined Saprotroph	0.079
Dung Saprotroph-Nematophagous	0.0008
Fungal Parasite-Litter Saprotroph	0.0094
Fungal Parasite-Soil Saprotroph	0.0023
Undefined Saprotroph	0.0706
Undefined Saprotroph-Wood Saprotroph	0.0023
unassigned	0.1312
