# Supplementary material for: Distinct effects of phyllosphere and rhizosphere microbes on invader Ageratina adenophora during its early life stages
Source: eLife. 2024 Jun 19;13:RP95502. doi: 10.7554/eLife.95502 (PMC11186635; doi:10.7554/eLife.95502)
Supplement: Figure 4—source data 1. [file elife-95502-fig4-data1.xlsx]

## Sheet: Sheet1
Figure 4 source date 1: Taxonomy information of 33 representative strains isolated from 40 dead seedlings. The numbers in brackets represent the similarity between our sequences and the sequences in the UNITE database.
Strain code	Number of isolates	Relative abundance	Taxonomy	accession numbers
Z25	8	0.0417	k__Fungi(100);p__Ascomycota(100);c__Dothideomycetes(100);o__Pleosporales(100);f__Didymellaceae(100);g__Allophoma(90);s__Allophoma_cylindrispora(90);Allophoma_cylindrispora(90);	OR473401
Z18	1	0.0052	k__Fungi(100);p__Ascomycota(100);c__Dothideomycetes(100);o__Pleosporales(100);f__Didymellaceae(100);g__Allophoma(90);s__Allophoma_cylindrispora(90);Allophoma_cylindrispora(90);	OR473394
Z26	1	0.0052	k__Fungi(100);p__Ascomycota(100);c__Dothideomycetes(100);o__Pleosporales(100);f__Didymellaceae(100);g__Allophoma(90);s__Allophoma_cylindrispora(90);Allophoma_cylindrispora(90);	OR473402
Z38	1	0.0052	k__Fungi(100);p__Ascomycota(100);c__Sordariomycetes(100);o__Glomerellales(100);f__Plectosphaerellaceae(100);g__Plectosphaerella(100);s__Plectosphaerella_cucumerina(95);Plectosphaerella_cucumerina(95);	OR473411
Z28	7	0.0365	k__Fungi(100);p__Ascomycota(100);c__Dothideomycetes(100);o__Pleosporales(100);f__Pleosporaceae(100);g__Alternaria(100);unclassified;unclassified;	OR473404
Z29	8	0.0417	k__Fungi(100);p__Ascomycota(100);c__Dothideomycetes(100);o__Pleosporales(100);f__Didymellaceae(100);g__Stagonosporopsis(92);unclassified;unclassified;	OR473405
Z31	1	0.0052	k__Fungi(100);p__Ascomycota(100);c__Dothideomycetes(100);o__Pleosporales(100);f__Didymellaceae(100);g__Epicoccum(100);s__Epicoccum_nigrum(93);Epicoccum_nigrum(93);	OR473406
Z32	9	0.0469	k__Fungi(100);p__Ascomycota(100);c__Dothideomycetes(100);o__Pleosporales(100);f__Pleosporaceae(100);g__Alternaria(100);unclassified;unclassified;	OR473407
Z33	14	0.0729	k__Fungi(100);p__Ascomycota(100);c__Dothideomycetes(100);o__Pleosporales(100);f__Pleosporaceae(100);g__Alternaria(100);unclassified;unclassified;	OR473408
Z34	10	0.0521	k__Fungi(100);p__Ascomycota(100);c__Dothideomycetes(100);o__Pleosporales(100);f__Pleosporaceae(100);g__Alternaria(100);unclassified;unclassified;	OR473409
Z36	3	0.0156	k__Fungi(100);p__Ascomycota(100);c__Dothideomycetes(100);o__Pleosporales(100);f__Didymellaceae(100);g__Boeremia(100);s__Boeremia_exigua(100);Boeremia_exigua(100);	OR473410
Z44	5	0.026	k__Fungi(100);p__Ascomycota(100);c__Dothideomycetes(100);o__Pleosporales(100);f__Didymellaceae(100);g__Allophoma(98);unclassified;unclassified;	OR473417
Z39	1	0.0052	k__Fungi(100);p__Ascomycota(100);c__Dothideomycetes(100);o__Capnodiales(100);f__Cladosporiaceae(100);g__Cladosporium(100);unclassified;unclassified;	OR473412
Z40	1	0.0052	k__Fungi(100);p__Ascomycota(100);c__Dothideomycetes(100);o__Pleosporales(100);f__Didymellaceae(100);g__Didymella(99);unclassified;unclassified;	OR473413
Z41	1	0.0052	k__Fungi(100);p__Ascomycota(100);c__Dothideomycetes(100);o__Pleosporales(100);f__Didymellaceae(100);g__Didymella(99);unclassified;unclassified;	OR473414
Z42	2	0.0104	k__Fungi(100);p__Ascomycota(100);c__Dothideomycetes(100);o__Pleosporales(100);f__Didymellaceae(100);g__Allophoma(96);s__Allophoma_cylindrispora(96);Allophoma_cylindrispora(96);	OR473415
Z43	3	0.0156	k__Fungi(100);p__Ascomycota(100);c__Dothideomycetes(100);o__Pleosporales(100);f__Didymellaceae(100);g__Allophoma(96);s__Allophoma_cylindrispora(96);Allophoma_cylindrispora(96);	OR473416
Z10	2	0.0104	k__Fungi(100);p__Ascomycota(100);c__Dothideomycetes(100);o__Pleosporales(100);f__Didymellaceae(100);g__Epicoccum(100);unclassified;unclassified;	OR473386
Z46	3	0.0156	k__Fungi(100);p__Ascomycota(100);c__Sordariomycetes(100);o__Glomerellales(100);f__Glomerellaceae(100);g__Colletotrichum(100);s__Colletotrichum_clavatum(100);Colletotrichum_clavatum(100);	OR473418
Z27	77	0.401	k__Fungi(100);p__Ascomycota(100);c__Dothideomycetes(100);o__Pleosporales(100);f__Didymellaceae(100);g__Allophoma(90);s__Allophoma_cylindrispora(90);Allophoma_cylindrispora(90);	OR473403
Z24	5	0.026	k__Fungi(100);p__Ascomycota(100);c__Dothideomycetes(100);o__Pleosporales(100);f__Didymellaceae(99);g__Didymella(99);unclassified;unclassified;	OR473400
Z23	8	0.0417	k__Fungi(100);p__Ascomycota(100);c__Dothideomycetes(100);o__Pleosporales(100);f__Pleosporaceae(100);g__Alternaria(100);unclassified;unclassified;	OR473399
Z22	2	0.0104	k__Fungi(100);p__Ascomycota(100);c__Sordariomycetes(100);o__Hypocreales(100);f__Nectriaceae(100);g__Fusarium(99);unclassified;unclassified;	OR473398
Z21	4	0.0208	k__Fungi(100);p__Ascomycota(100);c__Dothideomycetes(100);o__Pleosporales(100);f__Didymellaceae(100);g__Epicoccum(100);unclassified;unclassified;	OR473397
Z20	3	0.0156	k__Fungi(100);p__Ascomycota(100);c__Dothideomycetes(100);o__Pleosporales(99);f__Didymellaceae(99);g__Epicoccum(99);s__Epicoccum_nigrum(91);Epicoccum_nigrum(91);	OR473396
Z19	3	0.0156	k__Fungi(100);p__Ascomycota(100);c__Sordariomycetes(100);o__Hypocreales(100);f__Nectriaceae(100);g__Fusarium(100);s__Fusarium_kyushuense(100);Fusarium_kyushuense(100);	OR473395
Z17	1	0.0052	k__Fungi(100);p__Ascomycota(100);c__Dothideomycetes(100);o__Capnodiales(100);f__Cladosporiaceae(100);g__Cladosporium(100);unclassified;unclassified;	OR473393
Z16	1	0.0052	k__Fungi(100);p__Ascomycota(100);c__Dothideomycetes(100);o__Pleosporales(100);f__Didymellaceae(100);g__Stagonosporopsis(100);s__Stagonosporopsis_cucurbitacearum(93);Stagonosporopsis_cucurbitacearum(93);	OR473392
Z15	1	0.0052	k__Fungi(100);p__Ascomycota(100);c__Dothideomycetes(100);o__Pleosporales(100);f__Pleosporaceae(100);g__Alternaria(100);s__Alternaria_destruens(100);Alternaria_destruens(100);	OR473391
Z14	1	0.0052	k__Fungi(100);p__Ascomycota(100);c__Dothideomycetes(100);o__Pleosporales(100);f__Pleosporaceae(100);g__Alternaria(100);s__Alternaria_destruens(97);Alternaria_destruens(97);	OR473390
Z13	1	0.0052	k__Fungi(100);p__Ascomycota(100);c__Dothideomycetes(100);o__Pleosporales(98);f__Didymellaceae(98);g__Epicoccum(98);s__Epicoccum_nigrum(91);Epicoccum_nigrum(91);	OR473389
Z12	2	0.0104	k__Fungi(100);p__Ascomycota(100);c__Sordariomycetes(100);o__Sordariales(100);f__Chaetomiaceae(100);g__Chaetomium(100);unclassified;unclassified;	OR473388
Z11	2	0.0104	k__Fungi(100);p__Ascomycota(100);c__Sordariomycetes(100);o__Hypocreales(100);f__Nectriaceae(100);g__Fusarium(99);unclassified;unclassified;	OR473387
