# Supplementary material for: Distinct effects of phyllosphere and rhizosphere microbes on invader Ageratina adenophora during its early life stages
Source: eLife. 2024 Jun 19;13:RP95502. doi: 10.7554/eLife.95502 (PMC11186635; doi:10.7554/eLife.95502)
Supplement: Figure 5—source data 1. [file elife-95502-fig5-data1.xlsx]

## Sheet: Sheet1
Figure 5 source date 1: PERMANOVA of bacterial communities and function at each inoculation time treatments. Bold shows P < 0.05.
Inoculation time	Factor	Df	Bacterial community			Bacterial function
			R2	F.Model	Pr(>F)	R2	F.Model	Pr(>F)
G0	compartment	1	0.132	1.761	0.045	0.133	1.423	0.272
	nutrition	1	0.194	2.582	0.004	0.023	0.249	0.8
	source	-	-	-	-	-	-	-
G21	compartment	1	0.145	4.672	0.001	0.197	6.699	0.005
	nutrition	1	0.067	2.151	0.031	0.037	1.249	0.276
	source	1	0.167	5.384	0.001	0.18	6.137	0.002
G21+28	compartment	1	0.2	5.987	0.001	0.144	3.977	0.026
	nutrition	1	0.062	1.839	0.085	0.019	0.516	0.622
	source	1	0.069	2.056	0.041	0.197	6.699	0.005
G28	compartment	1	0.174	5.391	0.001	0.228	8.444	0.001
	nutrition	1	0.078	2.419	0.012	0.061	2.262	0.092
	source	1	0.102	3.148	0.002	0.17	6.288	0.001
