# Supplementary material for: Distinct effects of phyllosphere and rhizosphere microbes on invader Ageratina adenophora during its early life stages
Source: eLife. 2024 Jun 19;13:RP95502. doi: 10.7554/eLife.95502 (PMC11186635; doi:10.7554/eLife.95502)
Supplement: Figure 5—source data 2. [file elife-95502-fig5-data2.xlsx]

## Sheet: Sheet1
Figure 5 source date 2: PERMANOVA of fungal communities and function at each inoculation time treatments. Bold shows P < 0.05.
Inoculation time	Factor	Df	Fungal community			Fungal function
			R2	F.Model	Pr(>F)	R2	F.Model	Pr(>F)
G0	compartment	1	0.059	0.656	0.935	0.059	0.614	0.872
	nutrition	1	0.128	1.414	0.092	0.071	0.74	0.755
	source	-	-	-	-	-	-	-
G21	compartment	1	0.059	1.515	0.101	0.117	3.214	0.013
	nutrition	1	0.048	1.223	0.213	0.016	0.449	0.917
	source	1	0.11	2.797	0.006	0.14	3.867	0.01
G21+28	compartment	1	0.091	2.38	0.034	0.126	3.714	0.011
	nutrition	1	0.049	1.273	0.161	0.062	1.829	0.095
	source	1	0.091	2.372	0.025	0.136	4.033	0.006
G28	compartment	1	0.061	1.539	0.099	0.111	3.228	0.011
	nutrition	1	0.041	1.047	0.358	0.049	1.418	0.207
	source	1	0.108	2.724	0.007	0.154	4.503	0.001
