# Supplementary material for: Distinct effects of phyllosphere and rhizosphere microbes on invader Ageratina adenophora during its early life stages
Source: eLife. 2024 Jun 19;13:RP95502. doi: 10.7554/eLife.95502 (PMC11186635; doi:10.7554/eLife.95502)
Supplement: Figure 6—source data 1. [file elife-95502-fig6-data1.xlsx]

## Sheet: Sheet1
Figure 6 source date 1: Information about the abbreviations for the fungal functional guilds shown in Fig. 6D-E.
Fungal guild guild shown in Fig. 6D-E	Abbreviation of fungal function guild
Dung Saprotroph-Nematophagous	Dung Saprotroph-N
Dung Saprotroph-Plant Saprotroph-Soil Saprotroph	Dung Saprotroph-PSSS
Plant Pathogen-Undefined Parasite-Undefined Saprotroph	Plant Pathogen-UPUS
Ectomycorrhizal-Undefined Saprotroph	Ectomycorrhizal-US
Endophyte‒Plant Pathogen	Endophyte-PP
Ectomycorrhizal-Fungal Parasite-Soil Saprotroph-Undefined Saprotroph	Ectomycorrhizal-FPSSUS
Litter Saprotroph-Plant Pathogen	Litter Saprotroph-PP
Ectomycorrhizal-Fungal Parasite-Leaf Saprotroph-Plant Parasite-Undefined Saprotroph-Wood Saprotroph	Ectomycorrhizal-FPLSPPUSWS
Endophyte-Litter Saprotroph-Soil Saprotroph-Undefined Saprotroph	Endophyte-LSSSUS
Fungal Parasite-Plant Pathogen-Plant Saprotroph	Fungal Parasite-PPPS
Animal Endosymbiont-Animal Pathogen-Endophyte‒Plant Pathogen-Undefined Saprotroph	Animal Endosymbiont- APEPPUS
Dung Saprotroph-Ectomycorrhizal-Litter Saprotroph-Undefined Saprotroph	Dung Saprotroph-ELSUS
Animal Pathogen-Endophyte-Ericoid Mycorrhizal-Plant Pathogen-Wood Saprotroph	Animal Pathogen-EEMPPWS
Dung Saprotroph-Wood Saprotroph	Dung Saprotroph-WS
Endophyte‒Plant Pathogen-Undefined Saprotroph	Endophyte-PPUS
