# Supplementary material for: Distinct effects of phyllosphere and rhizosphere microbes on invader Ageratina adenophora during its early life stages
Source: eLife. 2024 Jun 19;13:RP95502. doi: 10.7554/eLife.95502 (PMC11186635; doi:10.7554/eLife.95502)
Supplement: Supplementary file 1. [file elife-95502-supp1.xlsx]

## Sheet: Sheet1
Supplementary file 1: Fertilizer content in the Pindstrup substrate.
Nutrient element	Content
Nitrate-N	4.536 g/m3
Ammonium-N	3.24 g/m3
Phosphorus (P)	3.888 g/m3
Phosphorus (P2O5)	9.072 g/m3
Potassium (K)	12.96 g/m3
Potassium (K20)	15.552 g/m3
Magnesium (Mg)	0.9072 g/m3
Magnesium (MgO)	1.4904 g/m3
Boron (B)	0.02592 g/m3
Molybdenum (Mo)	0.1296 g/m3
Copper (Cu)	0.11016 g/m3
Manganese (Mn)	0.18792 g/m3
Zinc (Zn)	0.05832 g/m3
Iron (Fe)	0.54432 g/m3
Wetting agent	100 (mL/m3)
pH	6
EC	40 ms/m
